# Supplementary material for: SH2 domain protein E (SHE) and ABL signaling regulate blood vessel size
Source: PubMed Central journal article supplement (PMC10349984; doi:10.1101/2023.07.03.547455), 2023-07-05
Supplement: media-3.pdf [file media-3.pdf]

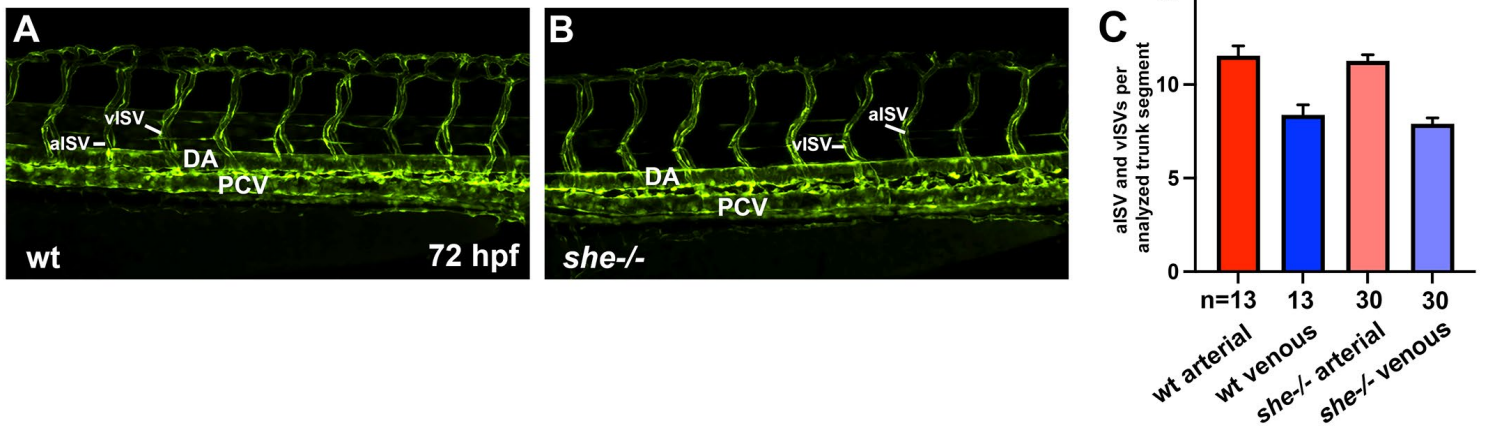

**Supplemental Figure S2. Trunk intersegmental vessel analysis in *she*<sup>-/-</sup> and wt sibling embryos.**

(A,B) Confocal images of the trunk region of live wt and *she*<sup>-/-</sup> sibling embryos in *kdr1:GFP* background at 72 hpf. Selected arterial (aISV) and venous (vISV) intersegmental vessels are shown. (C) The number of aISV and vISV was counted in a selected region in wt and *she* mutant embryos (the number of analyzed embryos in two independent experiments is provided as 'n'). Embryos were genotyped after the imaging. No significant difference between wt and *she* mutant embryos was observed ( $p > 0.05$ , t-Student's test).

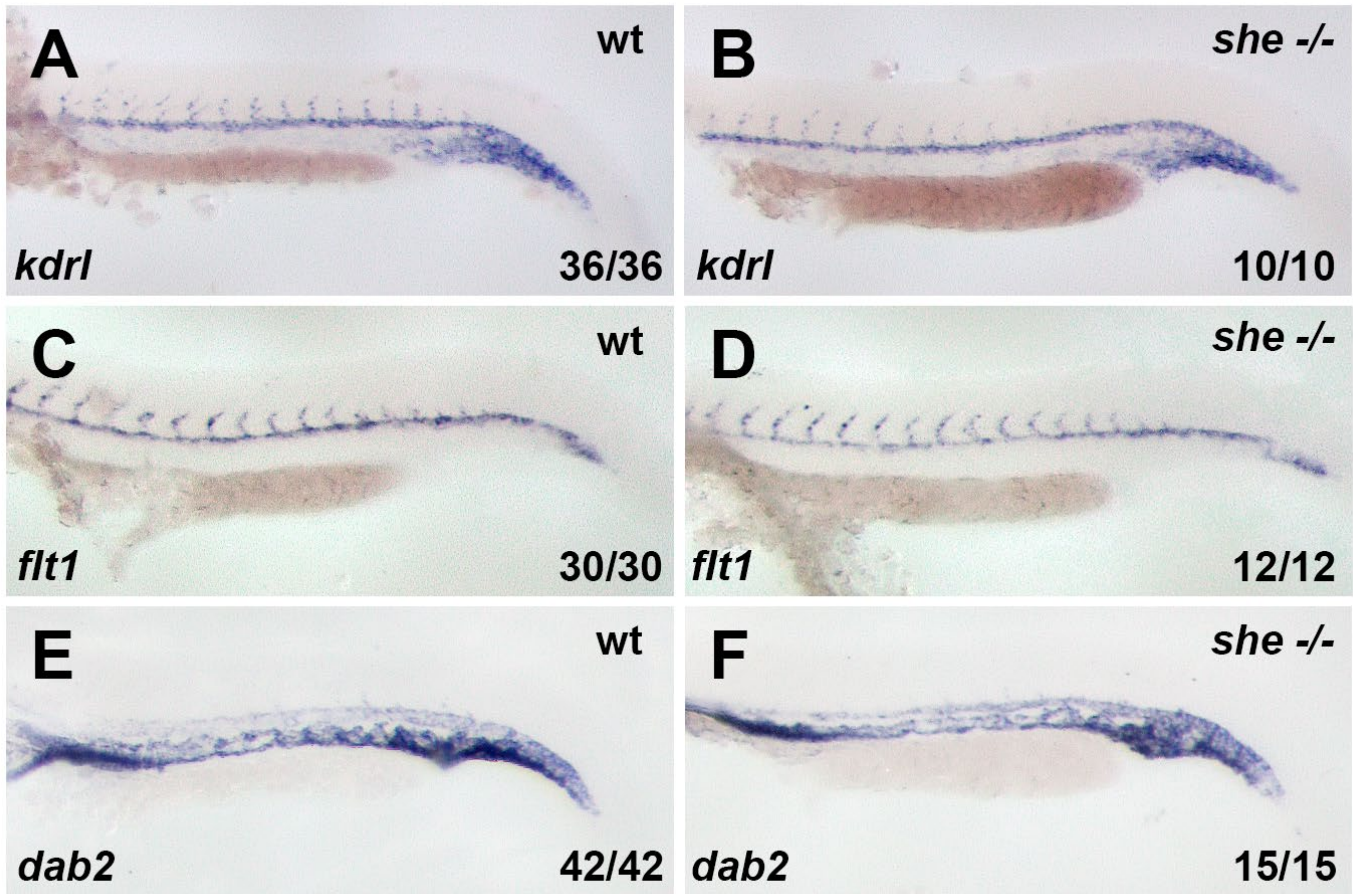

**Supplemental Figure S3. Endothelial marker expression, analyzed by in situ hybridization, is unaffected in *she* mutants at 24 hpf.**

(A, B) *kdr1* is strongly expressed in the dorsal aorta (DA) and intersegmental vessels (ISVs) and weakly expressed in the posterior cardinal vein (PCV) of both wild-type sibling and *she*<sup>-/-</sup> mutant embryos.

(C, D) *flt1* expression is restricted to the DA and ISVs of both wild-type and *she*<sup>-/-</sup> mutants.

(E, F) *dab2* is strongly expressed in the PCV and lightly expressed in the DA of both wild-type and *she*<sup>-/-</sup> mutants.

Trunk region is shown in all panels. Embryos were obtained from an incross of *she*<sup>+/-</sup>; *kdr1:GFP* parents and subsequently genotyped.

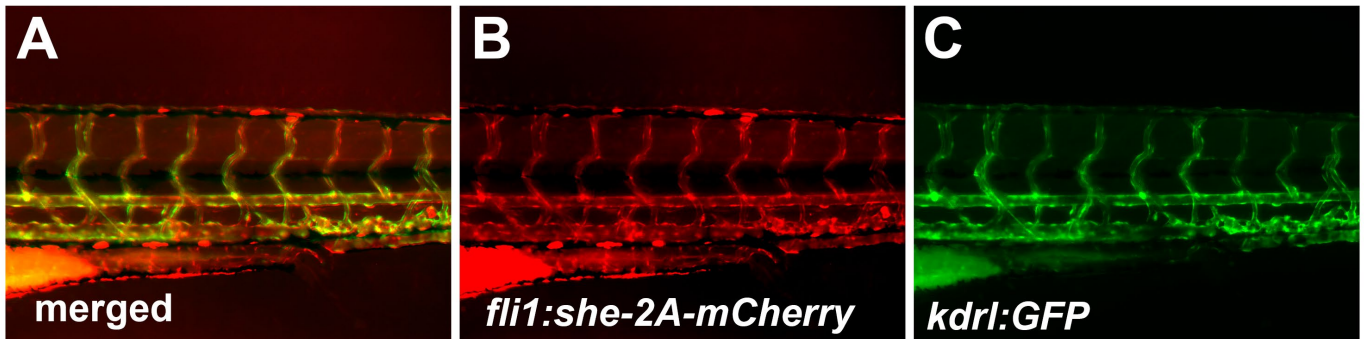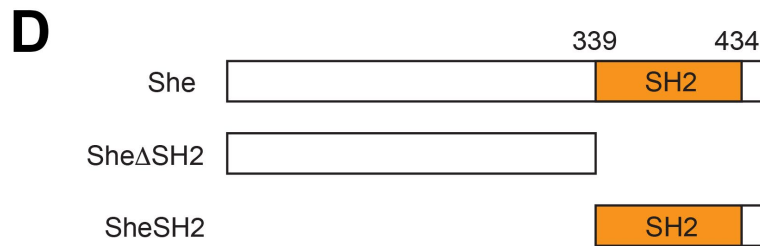

**Supplemental Figure S4. Generation of wild-type and mutant vascular endothelial-specific *she* zebrafish lines.** (A-C) Fluorescent microscopy image of *fli1:she-2A-mCherry*; *kdr1:GFP* embryo at 3 dpf. (D) A diagram of She deletion constructs.

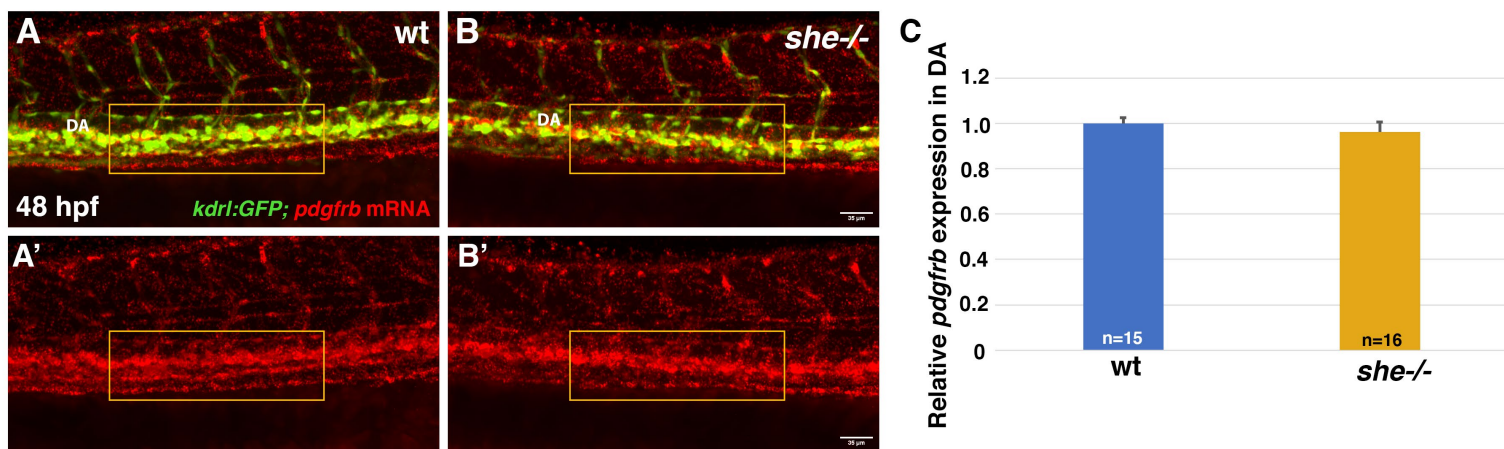

**Supplemental Figure S5.** *pdgfrb* mRNA expression analysis by hybridization chain reaction (HCR) at 48 hpf. (A,B) *pdgfrb* (red) expression in the trunk region of wild-type sibling and *she* mutant embryos in *kdr1:GFP* background at 48 hpf. Fluorescence within the dorsal aorta region (boxed) was selected for quantification. (C) Quantification of relative *pdgfrb* mRNA expression. No significant difference was observed ( $p > 0.05$ , Student's t-test).

**A**

|       |     | <b>ABL SITE 1</b>     |     | <b>ABL SITE 2</b>     |
|-------|-----|-----------------------|-----|-----------------------|
| Human | 204 | ILED <b>YAD</b> PYDAK | 228 | ENDG <b>YME</b> PYDAQ |
| Mouse | 207 | ILED <b>YAD</b> PYDAK | 231 | ENDG <b>YME</b> PYDAQ |
| Fish  | 162 | IVED <b>YAD</b> PFDAK | 186 | ENDG <b>YME</b> PYDAQ |
|       |     | <b>ABL SITE 3</b>     |     | <b>ABL SITE 4</b>     |
| Human | 290 | PPQL <b>YDT</b> PYEPA | 325 | PAAE <b>YEQ</b> PWEWK |
| Mouse | 292 | PPQL <b>YDT</b> PYEPS | 328 | PAAE <b>YEQ</b> PWEWK |
| Fish  | 228 | PPQ <b>YD</b> VPYEEV  | 254 | PPAE <b>YEL</b> PWEWK |

**B**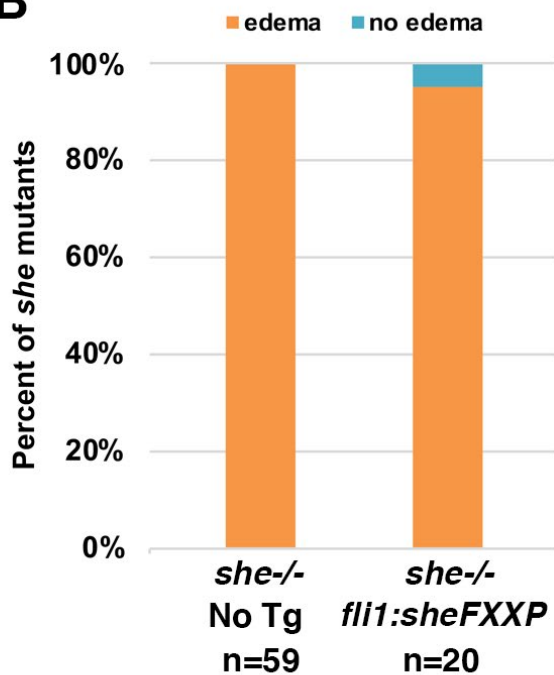**C**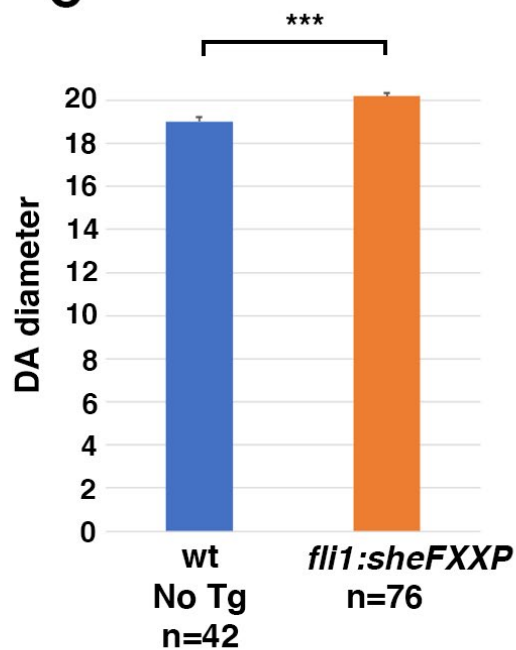

**Supplemental Figure S6. Consensus ABL phosphorylation sites YXXP are required for SHE function.**

(A) Consensus ABL phosphorylation sites are conserved between zebrafish, mouse and humans. (B) Vascular endothelial expression of a mutant construct *fli1:sheFXXP-2A-mCherry*, where all four consensus tyrosines have been substituted into phenylalanine, fails to rescue the pericardial edema in *she* mutants at 4 dpf. The first bar showing *she*<sup>-/-</sup> embryos (no Tg) is copied from Fig. 3J. (C) DA diameter measurement in *fli1:sheFXXP-2A-mCherry* embryos and sibling mCherry-negative embryos at 28 hpf. 5 measurements were performed in each embryo, which were then averaged for statistical calculations. n corresponds to the number of embryos. ± SEM is shown. \*\*\*p<0.001, Student's t-test.

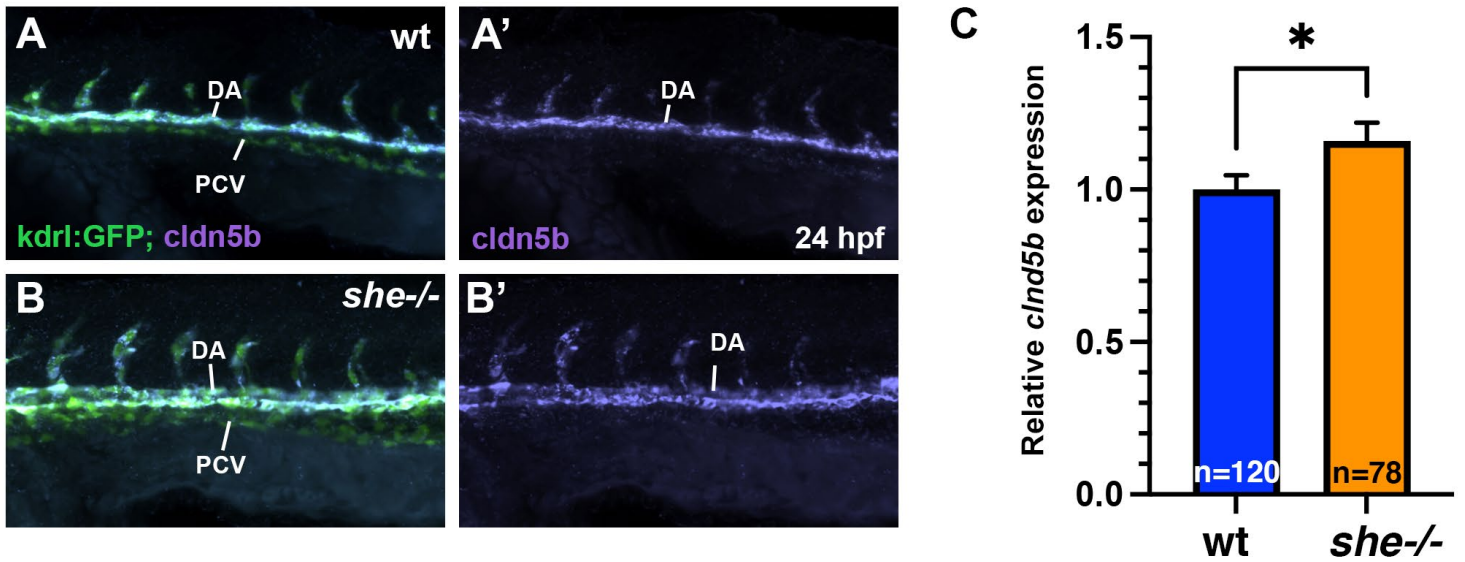

**Supplemental Figure S7. Hybridization chain reaction (HCR) analysis of *cldn5b* mRNA expression at 24 hpf.**

(A,B) *cldn5b* (purple) and *kdrl:GFP* fluorescence in the trunk region of *she* mutant and wild-type sibling embryos. DA, dorsal aorta; PCV, posterior cardinal vein. *cldn5b* fluorescence is shown in A',B'.

(C) Quantification of *cldn5b* fluorescence in the DA. \* $p=0.036$ , Student's t-test. Error bars show SEM. Data show combined results from two independent experiments.

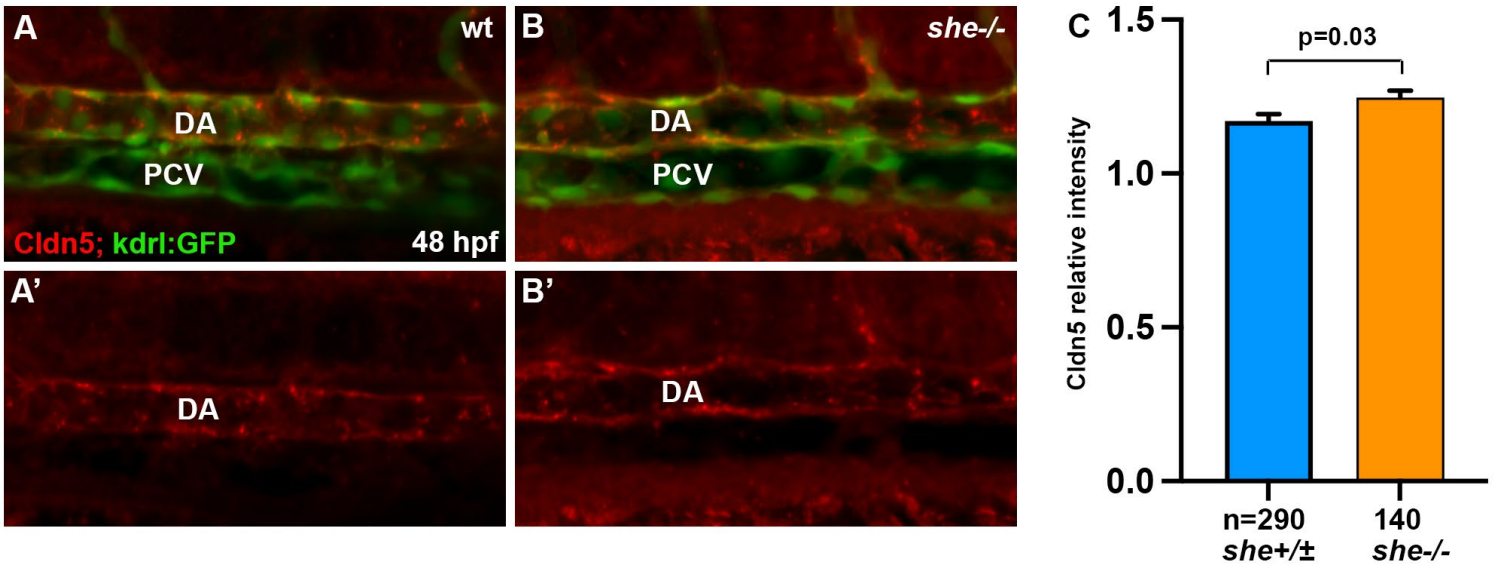

**Supplemental Figure S8. Cldn5 protein expression is increased in *she* mutant embryos.**

(A,B) Immunostaining for Cldn5 (red) combined with *kdr1:GFP* fluorescence in wild-type sibling and *she* mutant embryos at 48 hpf. Red channel is shown in A',B'. DA, dorsal aorta; PCV, posterior cardinal vein.

(C) Quantification of Cldn5 immunofluorescence within the DA. Embryos were obtained from an incross of *she*<sup>+/-</sup>; *kdr1:GFP* parents and subsequently genotyped. *she*<sup>+/+</sup> and *she*<sup>+/-</sup> genotypes were combined for this analysis. Error bars show SEM; Student's t-test was used.



**Supplemental Table S1. Primer sequences used to generate she mutant and transgenic lines and perform qPCR**

|                     |                                                              |
|---------------------|--------------------------------------------------------------|
| she_F1              | ATCAATAATAGGGGCCACTTTGAG                                     |
| she_R1              | CCGTCCTAACTCGATGGCAG                                         |
| she_gRNA1           | GCGTAATACGACTCACTATAGGAGGCGAAGGTGAGGGGTCGTTTTAGAGCTAGAAATAG  |
| she_gRNA2           | GCGTAATACGACTCACTATAGGCAGGGTGGGATCAACAATGTTTTAGAGCTAGAAATAGC |
| she_gRNA_R1         | AAAGCACCGACTCGGTGCCA                                         |
| she_gRNA left       | TATGCTCTTGTCAGAGATTCG                                        |
| she_gRNA right      | TGACCAAAACATACCCTTTTCA                                       |
| she_gRNA midR       | CTGACAGGGCTCTAACAATCTG                                       |
| she_attB_F1         | GGGGACAAGTTTGTACAAAAAAGCAGGCTTCACCATGGCGAAGTGGTTTAAAGATTTTCC |
| she_attB_F3         | GGGGACCACTTTGTACAAGAAAGCTGGGTTGTGTGTGCGTGGCACGGGGTG          |
| she_deltaSH2_attB_R | GGGGACCACTTTGTACAAGAAAGCTGGGTTGCTCTGTTTCTCCAATGGCAGG         |
| sheSH2_attB_F       | GGGGACAAGTTTGTACAAAAAAGCAGGCTTCACCATGTGGTATCATGGCAGTGTGAGTCG |
| she_attB_R3         | GGGGACCACTTTGTACAAGAAAGCTGGGTTGTGTGTGCGTGGCACGGGGTG          |
| sheYXXP1_F1         | CAGAACCGATCATCGTAGAGGATTTTGCCGACCCATTTGATGCTGAG              |
| sheYXXP1_R1         | CTCAGCATCAAATGGGTCGGCAAAATCCTCTACGATGATCGGTTCTG              |
| sheYXXP2_F1         | GAAGGAGAGAACGATGGCTTCATGGAGCCTTATGATGCCAGCTC                 |
| sheYXXP2_R1         | GAGCTGGGCATCATAAGGCTCCATGAAGCCATCGTTTCTCTCCTTC               |
| sheYXXP3_F2         | GTCTGGACCCCTCAGATCTTTGATGTCCCATATGAGGAGG                     |
| sheYXXP3_R2         | CCTCCTCATATGGGACATCAAAGATCTGAGGGGGTCCAGAC                    |
| sheYXXP4_F1         | CAGACCGCCGGCAGAGTTTGAGCTGCCCTGGGAGTGGAAGAAAG                 |
| sheYXXP4_R1         | CTTTCTTCCACTCCAGGGCAGCTCAAACCTCTGCCGGCGGTCTG                 |
| cldn5a-F            | GACAACGTGAAAGCGCGGG                                          |
| cldn5a-R            | AGGAGCAGCAGAGTATGCTTCCC                                      |
| EF1a-F              | TCACCCTGGGAGTGAAACAGC                                        |
| EF1a-R              | ACTTGCAGGCGATGTGAGCAG                                        |

## MOVIE LEGENDS

**Movie 1. Blood flow in the tail region of wild-type zebrafish embryos.** Wild-type siblings obtained from an incross of *she<sup>ci26</sup>* heterozygous adults in *kdr1:GFP; gata1:dsRed* background were imaged at 4 dpf using confocal microscopy.

**Movie 2. Blood flow in the tail region of *she* mutant embryos.** Mutant embryos obtained from an incross of *she<sup>ci26</sup>* heterozygous adults in *kdr1:GFP; gata1:dsRed* background were imaged at 4 dpf using confocal microscopy.
